# Supplementary material for: Novel micro-rings of molybdenum disulfide (MoS2)
Source: Royal Society of Chemistry journal article supplement (doi:10.1039/c4nr05111d), 2014-10-13
Supplement: c4nr05111d1.pdf [file c4nr05111d1.pdf]

*Supporting Information for*

**Novel Micro-Rings of Molybdenum Disulfide (MoS<sub>2</sub>)**

Chao Fan,<sup>a</sup> Tao Li,<sup>b</sup> Zhongming Wei,<sup>\*b</sup> Nengjie Huo,<sup>a</sup> Fangyuan Lu,<sup>a</sup> Juehan Yang,<sup>a</sup> Renxiong Li,<sup>a</sup> Shengxue Yang,<sup>a</sup> Bo Li,<sup>a</sup> Wenping Hu,<sup>\*c</sup> and Jingbo Li<sup>\*a</sup>

<sup>a</sup>State Key Laboratory for Superlattices and Microstructures, Institute of Semiconductors, Chinese Academy of Sciences, Beijing 100083, P. R. China

<sup>b</sup>Nano-Science Center & Department of Chemistry, University of Copenhagen, Universitetsparken 5, DK-2100 Copenhagen Ø, Denmark

<sup>c</sup>Beijing National Laboratory for Molecular Sciences, Key Laboratory of Organic Solids, Institute of Chemistry, Chinese Academy of Sciences, Beijing 100190, P. R. China

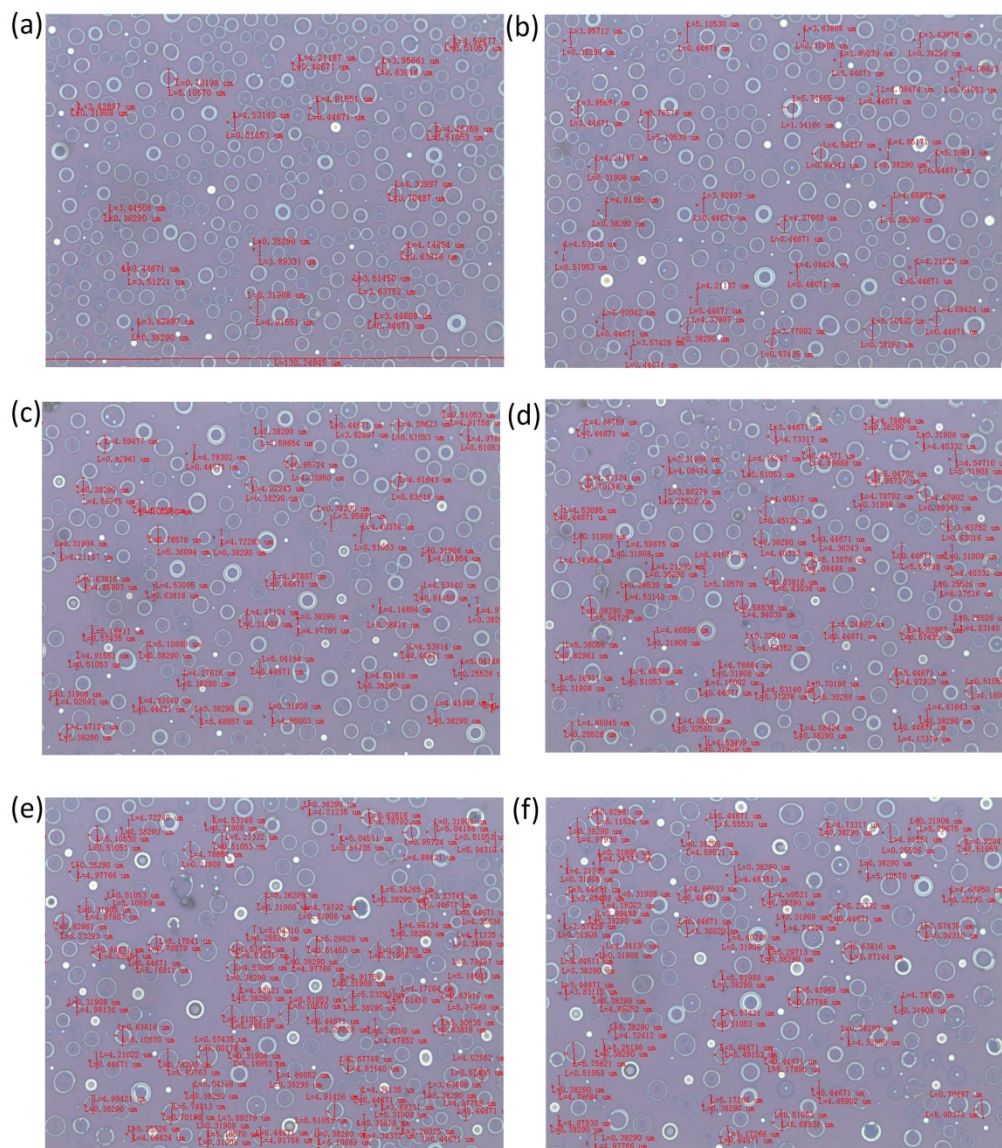

Fig.S1 OM images of the as prepared MoS<sub>2</sub> micro-rings with the length of external diameter and width marked on.

Table S1. Statistical results for external diameter, width and height of MoS<sub>2</sub> micro-rings.

| External diameter/ $\mu\text{m}$ | Statistical number | Width/ $\mu\text{m}$ | Statistical number | Height/nm | Statistical number |
|----------------------------------|--------------------|----------------------|--------------------|-----------|--------------------|
| 6.0-6.1                          | 1                  | 1.3-1.4              | 1                  | 180-190   | 1                  |
| 5.9-6.0                          | 1                  | 1.2-1.3              | 0                  | 170-180   | 0                  |
| 5.8-5.9                          | 4                  | 1.1-1.2              | 0                  | 160-170   | 3                  |
| 5.7-5.8                          | 3                  | 1.0-1.1              | 1                  | 150-160   | 0                  |
| 5.6-5.7                          | 1                  | 0.9-1.0              | 3                  | 140-150   | 2                  |
| 5.5-5.6                          | 2                  | 0.8-0.9              | 6                  | 130-140   | 3                  |
| 5.4-5.5                          | 5                  | 0.7-0.8              | 10                 | 120-130   | 4                  |
| 5.3-5.4                          | 6                  | 0.6-0.7              | 13                 | 110-120   | 11                 |
| 5.2-5.3                          | 12                 | 0.5-0.6              | 39                 | 100-110   | 12                 |
| 5.1-5.2                          | 26                 | 0.4-0.5              | 55                 | 90-100    | 23                 |
| 5.0-5.1                          | 11                 | 0.3-0.4              | 110                | 80-90     | 19                 |
| 4.9-5.0                          | 27                 | 0.2-0.3              | 9                  | 70-80     | 37                 |
| 4.8-4.9                          | 7                  | 0.1-0.2              | 0                  | 60-70     | 38                 |
| 4.7-4.8                          | 14                 |                      |                    | 50-60     | 31                 |
| 4.6-4.7                          | 7                  |                      |                    | 40-50     | 33                 |
| 4.5-4.6                          | 27                 |                      |                    | 30-40     | 10                 |
| 4.4-4.5                          | 16                 |                      |                    | 20-30     | 3                  |
| 4.3-4.4                          | 10                 |                      |                    | 10-20     | 0                  |
| 4.2-4.3                          | 14                 |                      |                    | 0-10      | 0                  |
| 4.1-4.2                          | 10                 |                      |                    |           |                    |
| 4.0-4.1                          | 14                 |                      |                    |           |                    |
| 3.9-4.0                          | 4                  |                      |                    |           |                    |
| 3.8-3.9                          | 13                 |                      |                    |           |                    |
| 3.7-3.8                          | 1                  |                      |                    |           |                    |
| 3.6-3.7                          | 5                  |                      |                    |           |                    |
| 3.5-3.6                          | 3                  |                      |                    |           |                    |
| 3.4-3.5                          | 2                  |                      |                    |           |                    |
| 3.3-3.4                          | 0                  |                      |                    |           |                    |
| 3.2-3.3                          | 1                  |                      |                    |           |                    |
| 3.1-3.2                          | 0                  |                      |                    |           |                    |

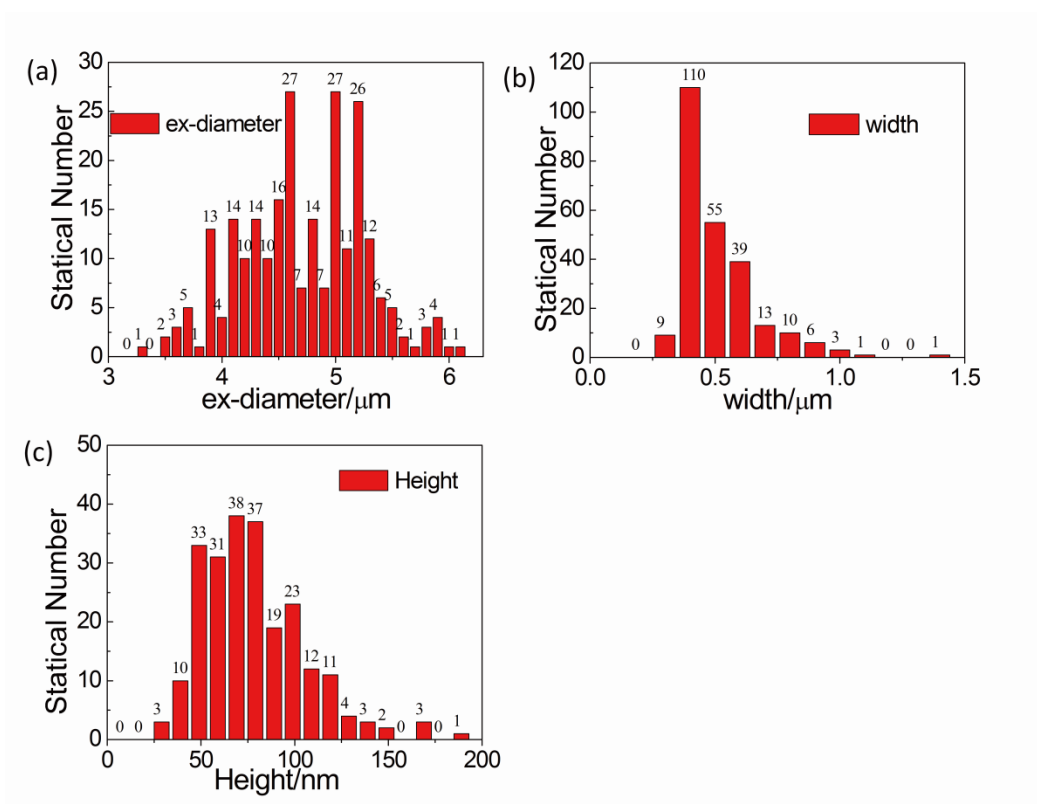

Fig.S2 Histogram of statistical results for external diameter (a), width (b) and height (c).

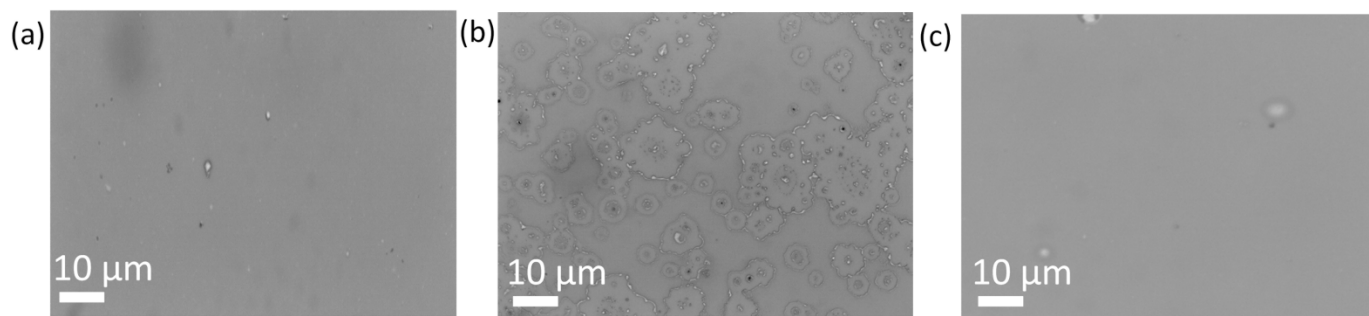

Fig.S3 OM images of the as prepared MoS<sub>2</sub> at different temperatures of 665 °C (a) and 675 °C (b), (c) OM image of the as prepared MoS<sub>2</sub> when the flow of Ar gas was 50 sccm .

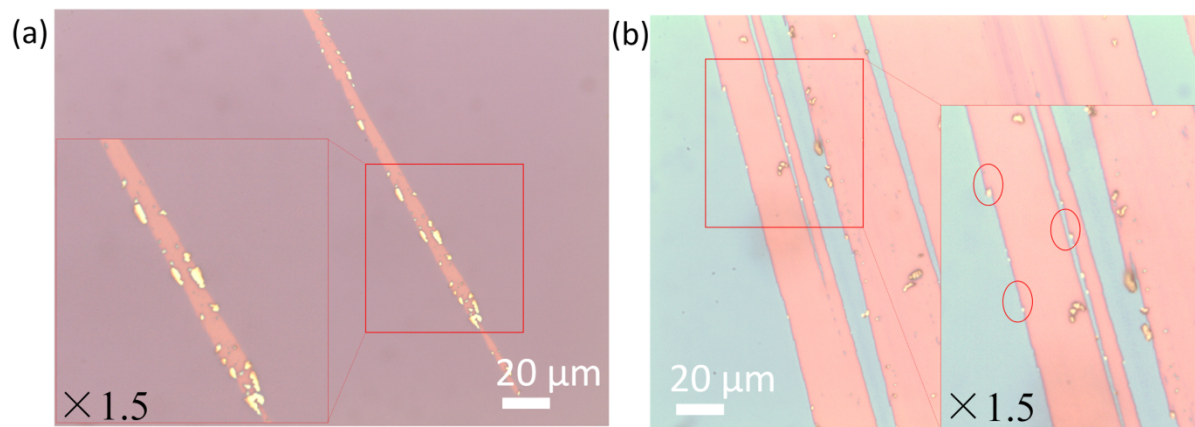

Fig.S4 OM images of the as prepared samples. Inset of (a) and (b) are Zoom-in images for the scratches part of MoO<sub>3</sub> films after reaction.

To approve the proposal of “the MoO<sub>3</sub> pyramids with larger height were preferred to react with S to synthesize MoS<sub>2</sub>”, several experiments were made. Different MoO<sub>3</sub> films, with some scratches using tweezers, were put in the furnace to react with S at 680 °C for 5 min. Inset of Fig. S4 show OM images of the scratches. The yellow parts in two images are MoS<sub>2</sub> flakes or dots. MoS<sub>2</sub> flakes or dots resist in the protrusive parts of the scratches rather than other parts of MoO<sub>3</sub> films.
